# Supplementary material
Source: Springer Nature journal article supplement (https://www.springermedizin.de/resource/supplementary/12885_2009_2075_MOESM7_ESM.pdf/9460454)

**A****Control****EGCG****H&E**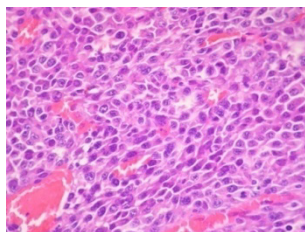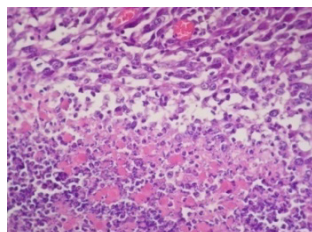**PCNA**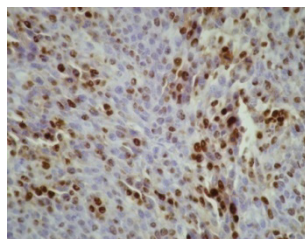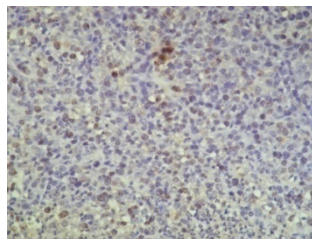**HSP70**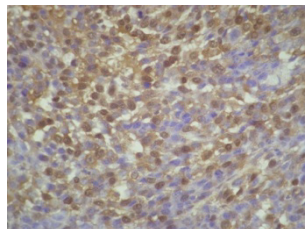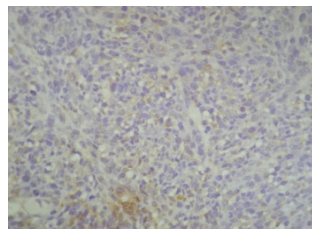**HSP90**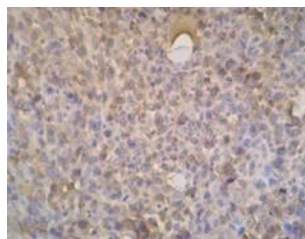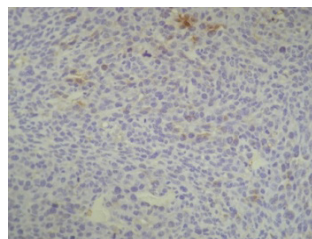**B****Control****EGCG**

1 2 3 4 5 6 7 8

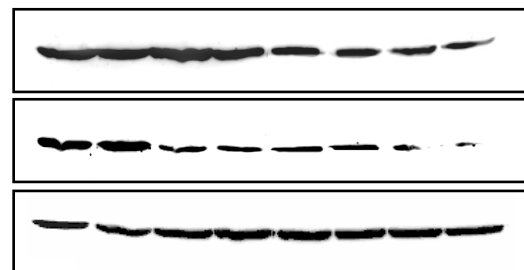**HSP70****HSP90****Actin**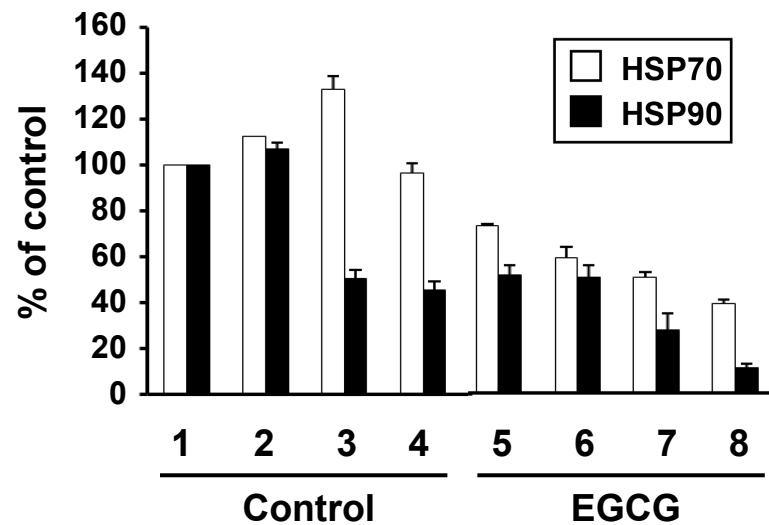

Supplement: MOESM7 [file 9460454]
